# Supplementary material for: Electrical stimulation devices for the prevention of venous thromboembolism: Preliminary studies of physiological efficacy and user satisfaction
Source: PubMed Central journal article supplement — J Rehabil Assist Technol Eng. 2018 Sep 25;5:2055668318800218. doi: 10.1177/2055668318800218 (PMC6453094; doi:10.1177/2055668318800218), 2018-09-25
Supplement: Supplemental_material.pdf [file Supplemental_material.pdf]

## Appendix A: Device evaluation completed by participating patients

Study number:

Date:

These devices help prevent blood clots in the legs if used whilst in bed. This is a survey to find out how you feel about using the devices. The information will be used to help us identify the best way to prevent blood clots. It will require about 5 minutes of your time.

Please mark the box that most closely matches your experience of Microstim 2V2/Geko/Flowtron.

1. The device was comfortable.
  - Strongly agree
  - Agree
  - Neither agree nor disagree
  - Disagree
  - Strongly disagree
2. The device did not interfere with my ability to move in bed.
  - Strongly agree
  - Agree
  - Neither agree nor disagree
  - Disagree
  - Strongly disagree
3. Even though it would help prevent blood clots, I would not use this device.
  - Strongly agree
  - Agree
  - Neither agree nor disagree
  - Disagree
  - Strongly disagree
4. I would rather have a daily injection than use this device.
  - Strongly agree
  - Agree
  - Neither agree nor disagree
  - Disagree
  - Strongly disagree
5. I would like to use this device in the future
  - Strongly agree
  - Agree
  - Neither agree nor disagree
  - Disagree
  - Strongly disagree

Comments:

## **Appendix B: Device evaluation completed by participating nurses**

Study number:

Date:

These devices help prevent blood clots in the legs if used whilst in bed. This is a survey to find out how you feel about using them. The information will be used to help us identify the best way to prevent blood clots in stroke patients. It will require about 5 minutes of your time.

Please mark the box that most closely matches your experience of Microstim 2V2/Geko/Flowtron.

1. The majority of patients would be able to wear the device.
  - Strongly agree
  - Agree
  - Neither agree nor disagree
  - Disagree
  - Strongly disagree
2. The device looks easy to apply.
  - Strongly agree
  - Agree
  - Neither agree nor disagree
  - Disagree
  - Strongly disagree
3. The device would make it difficult to provide care to the patient.
  - Strongly agree
  - Agree
  - Neither agree nor disagree
  - Disagree
  - Strongly disagree
4. It would be easy to monitor skin integrity and pressure areas.
  - Strongly agree
  - Agree
  - Neither agree nor disagree
  - Disagree
  - Strongly disagree
5. The device would interfere with the patient's ability to move in bed.
  - Strongly agree
  - Agree
  - Neither agree nor disagree
  - Disagree
  - Strongly disagree

6. The device would limit the patient's ability to mobilise or engage in rehabilitation.
- Strongly agree
  - Agree
  - Neither agree nor disagree
  - Disagree
  - Strongly disagree
7. The device would not be suitable for patients due to the risk of falls.
- Strongly agree
  - Agree
  - Neither agree nor disagree
  - Disagree
  - Strongly disagree
8. Patients would complain about using this device.
- Strongly agree
  - Agree
  - Neither agree nor disagree
  - Disagree
  - Strongly disagree
9. I would like to use this device in the future
- Strongly agree
  - Agree
  - Neither agree nor disagree
  - Disagree
  - Strongly disagree

Comments:

### Appendix C: Patients evaluated the devices on different criteria by attributing a score

| Device | Q1 <sup>1</sup> | Q2 | Q3 | Q4 | Q5 | Satisfaction score <sup>3</sup> |
|--------|-----------------|----|----|----|----|---------------------------------|
| FES    | 4 <sup>2</sup>  | 2  | 4  | 4  | 4  | 84                              |
| Geko   | 4               | 4  | 4  | 3  | 3  | 89                              |
| IPC    | 3               | 2  | 3  | 3  | 3  | 66                              |

| Device | Q1 <sup>4</sup> | Q2 | Q3 | Q4 | Q5 | Q6 | Q7 | Q8 | Q9 | Satisfaction score <sup>3</sup> |
|--------|-----------------|----|----|----|----|----|----|----|----|---------------------------------|
| FES    | 3 <sup>2</sup>  | 3  | 2  | 3  | 3  | 3  | 2  | 3  | 3  | 65                              |
| GEKO   | 4               | 4  | 4  | 3  | 4  | 4  | 3  | 4  | 4  | 85                              |
| IPC    | 3               | 3  | 1  | 3  | 1  | 0  | 0  | 0  | 1  | 31                              |

<sup>1</sup> Patients gave a score between 1 and 5 to each of 5 questions

<sup>2</sup>The values in the table represent the mean difference between the worst score possible and the patient's/nurses scores

<sup>3</sup>The average mean difference was used to produce a satisfaction score (expressed as a percentage)

<sup>4</sup>Nurses gave a score between 1 and 5 to each of 9 questions

### Appendix D: Randomisation of six possible sequences of interventions

| Sequence | Intervention |           |           |
|----------|--------------|-----------|-----------|
| 1        | Geko         | Microstim | IPC       |
| 2        | Geko         | IPC       | Microstim |
| 3        | Microstim    | Geko      | IPC       |
| 4        | IPC          | Microstim | Geko      |
| 5        | Microstim    | IPC       | Geko      |
| 6        | IPC          | Geko      | Microstim |
